# Supplementary material
Source: publisher site journal article supplement (https://www.spandidos-publications.com/6321/downloadSupplementary)

Figure S1. Schematic representation of the QARP score. Created with BioRender.com. QARP, quantitative assessment of histological regression in peritoneal carcinomatosis.

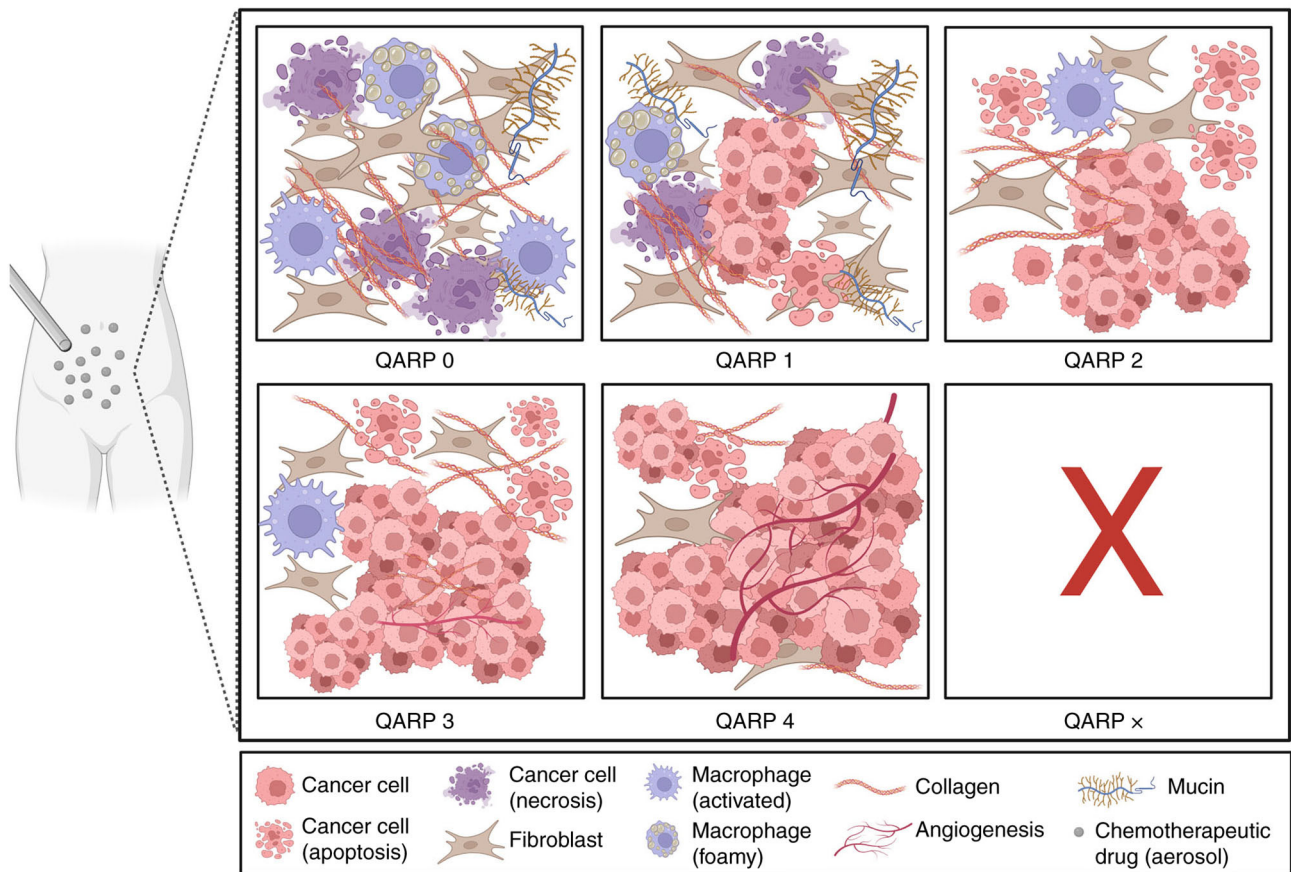

Supplement: Supplementary file 1 [file downloadSupplementary]
